# Supplementary material
Source: publisher figshare collection journal article supplement (https://acs.figshare.com/ndownloader/files/5673255)
Supplement: Supplementary file 1 [file 5673255]

# BIOCHEMISTRY

including biophysical chemistry & molecular biology

Biochemistry, 1996, 35(36), 11805-11811, DOI: [10.1021/bi960381m](https://doi.org/10.1021/bi960381m)

## Terms & Conditions

Electronic Supporting Information files are available without a subscription to ACS Web Editions. The American Chemical Society holds a copyright ownership interest in any copyrightable Supporting Information. Files available from the ACS website may be downloaded for personal use only. Users are not otherwise permitted to reproduce, republish, redistribute, or sell any Supporting Information from the ACS website, either in whole or in part, in either machine-readable form or any other form without permission from the American Chemical Society. For permission to reproduce, republish and redistribute this material, requesters must process their own requests via the RightsLink permission system. Information about how to use the RightsLink permission system can be found at <http://pubs.acs.org/page/copyright/permissions.html>

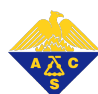

**ACS Publications**

MOST TRUSTED. MOST CITED. MOST READ.

Copyright © 1996 American Chemical Society

Supplementary Materials for "Inactivation of Vanadium Bromoperoxidase: Formation of 2-Oxohistidine" by Gretchen E. Meister Winter and Alison Butler\*

Figure captions for the Supplementary Materials

Figure S-1. HPLC-ECD showing the formation of N $\alpha$ -benzoyl-2-oxohistidine catalyzed by V-BrPO. Reaction conditions are as described in the test. The HPLC chromatogram was scanned with a Logitech Scanman 256 using the FotoTouch Color program and digitized using the "Un-Scan-It" program.

Figure S-2. HPLC-ECD showing the formation of N $\alpha$ -benzoyl-2-oxohistidine in the *cis*-VO $_2^+$  catalyzed oxidation of bromide by hydrogen peroxide. Conditions: 0.4 mM NH $_4$ VO $_3$ , 5.0 mM H $_2$ O $_2$ , 0.2 M KBr and 1.0 mM N $\alpha$ -benzoylhistidine in 50 mM HClO $_4$ . The reaction was allowed to proceed for 1 hr before the HPLC-ECD was run. The HPLC chromatogram was digitized as described in Figure S-1.

Figure S-3. HPLC-ECD showing the formation of N $\alpha$ -benzoyl-2-oxohistidine in the MoO(O $_2$ ) $_2$ (ox) $^{2-}$  (ox $^{2-}$  is oxalate)-catalyzed oxidation of bromide by hydrogen peroxide. Reaction conditions: 1.5 mM K $_2$ MoO(O $_2$ ) $_2$ (ox), 5.0 mM H $_2$ O $_2$ , 0.1 M KBr and 1.5 mM N $\alpha$ -benzoylhistidine in 90 mM oxalate buffer, pH 5.0. The reaction was allowed to proceed for 3 hr before HPLC-ECD analysis. The HPLC chromatogram was digitized as described in Figure S-1.

Figure S-4. HPLC-ECD showing the formation of N $\alpha$ -benzoyl-2-oxohistidine in the reaction of HOBr (1.0 mM) and N $\alpha$ -benzoylhistidine in acid (0.05 M HClO $_4$ ). The HPLC chromatogram was digitized as described in Figure S-1.

Figure S-1

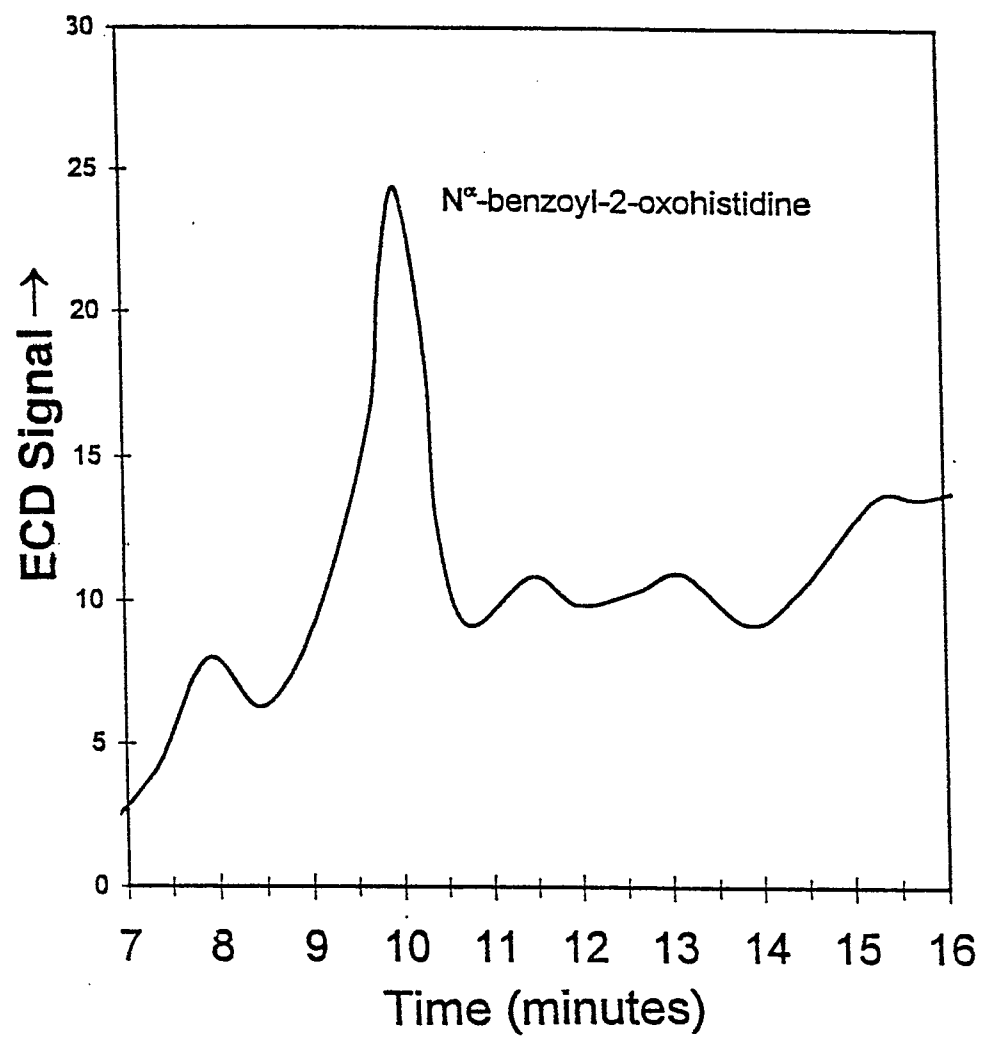

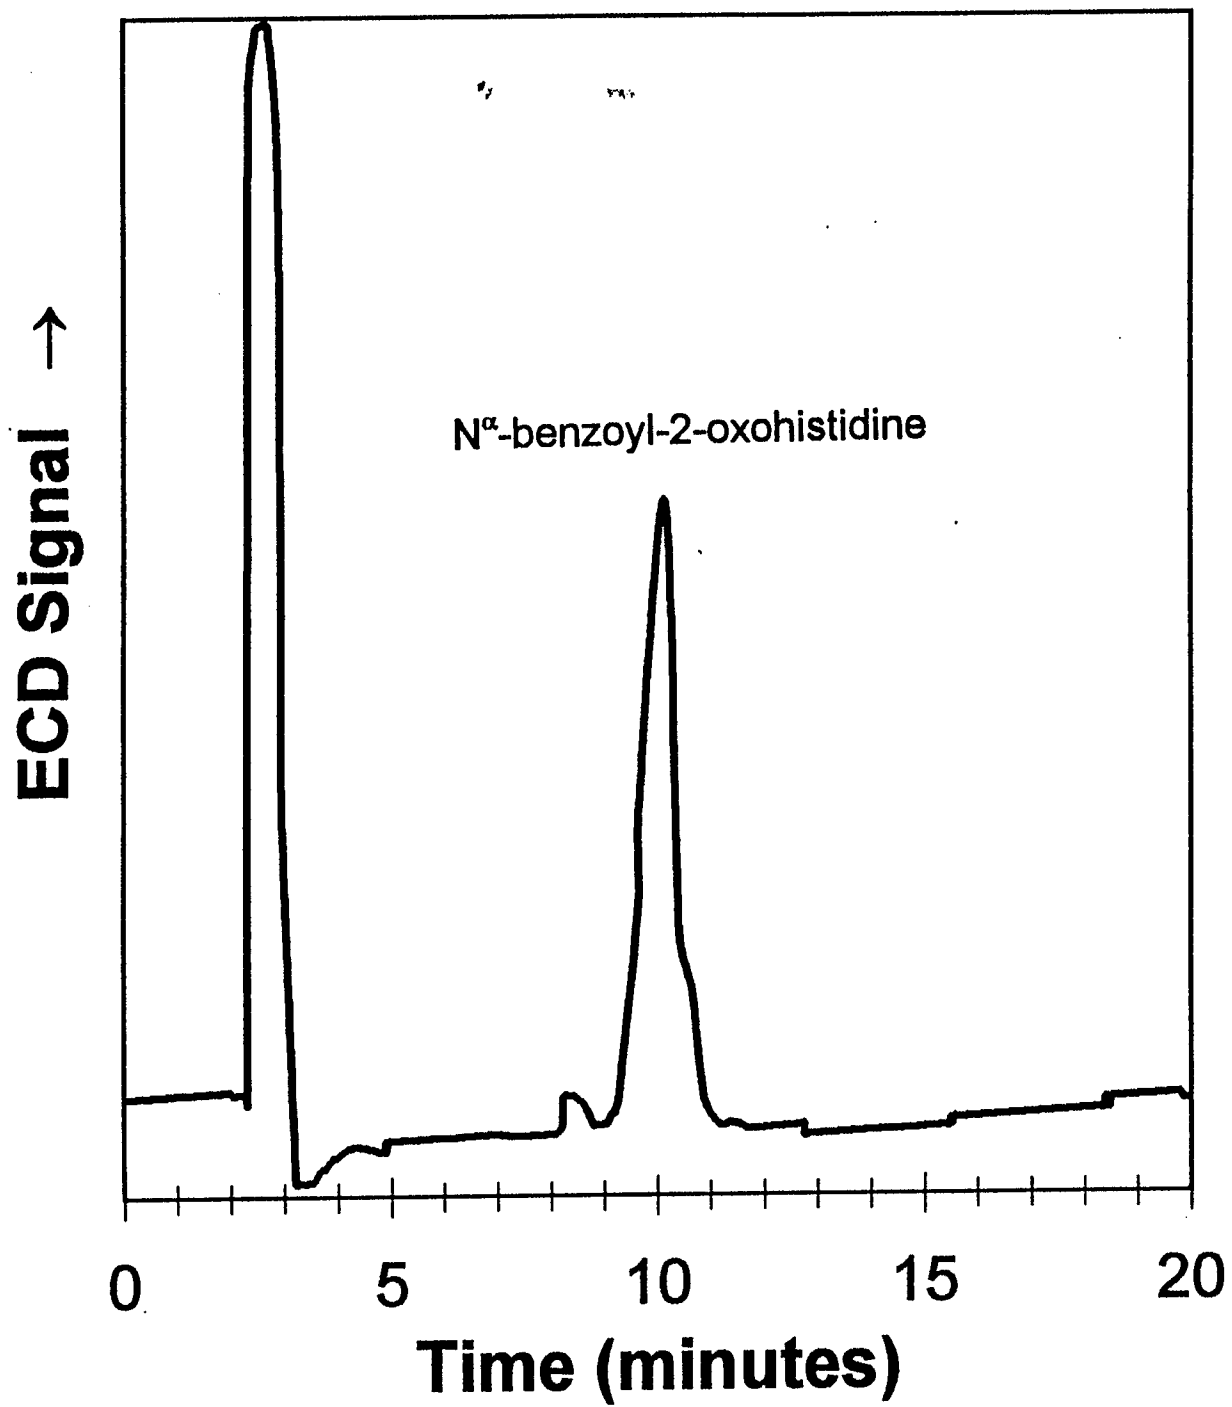

Figure S-2

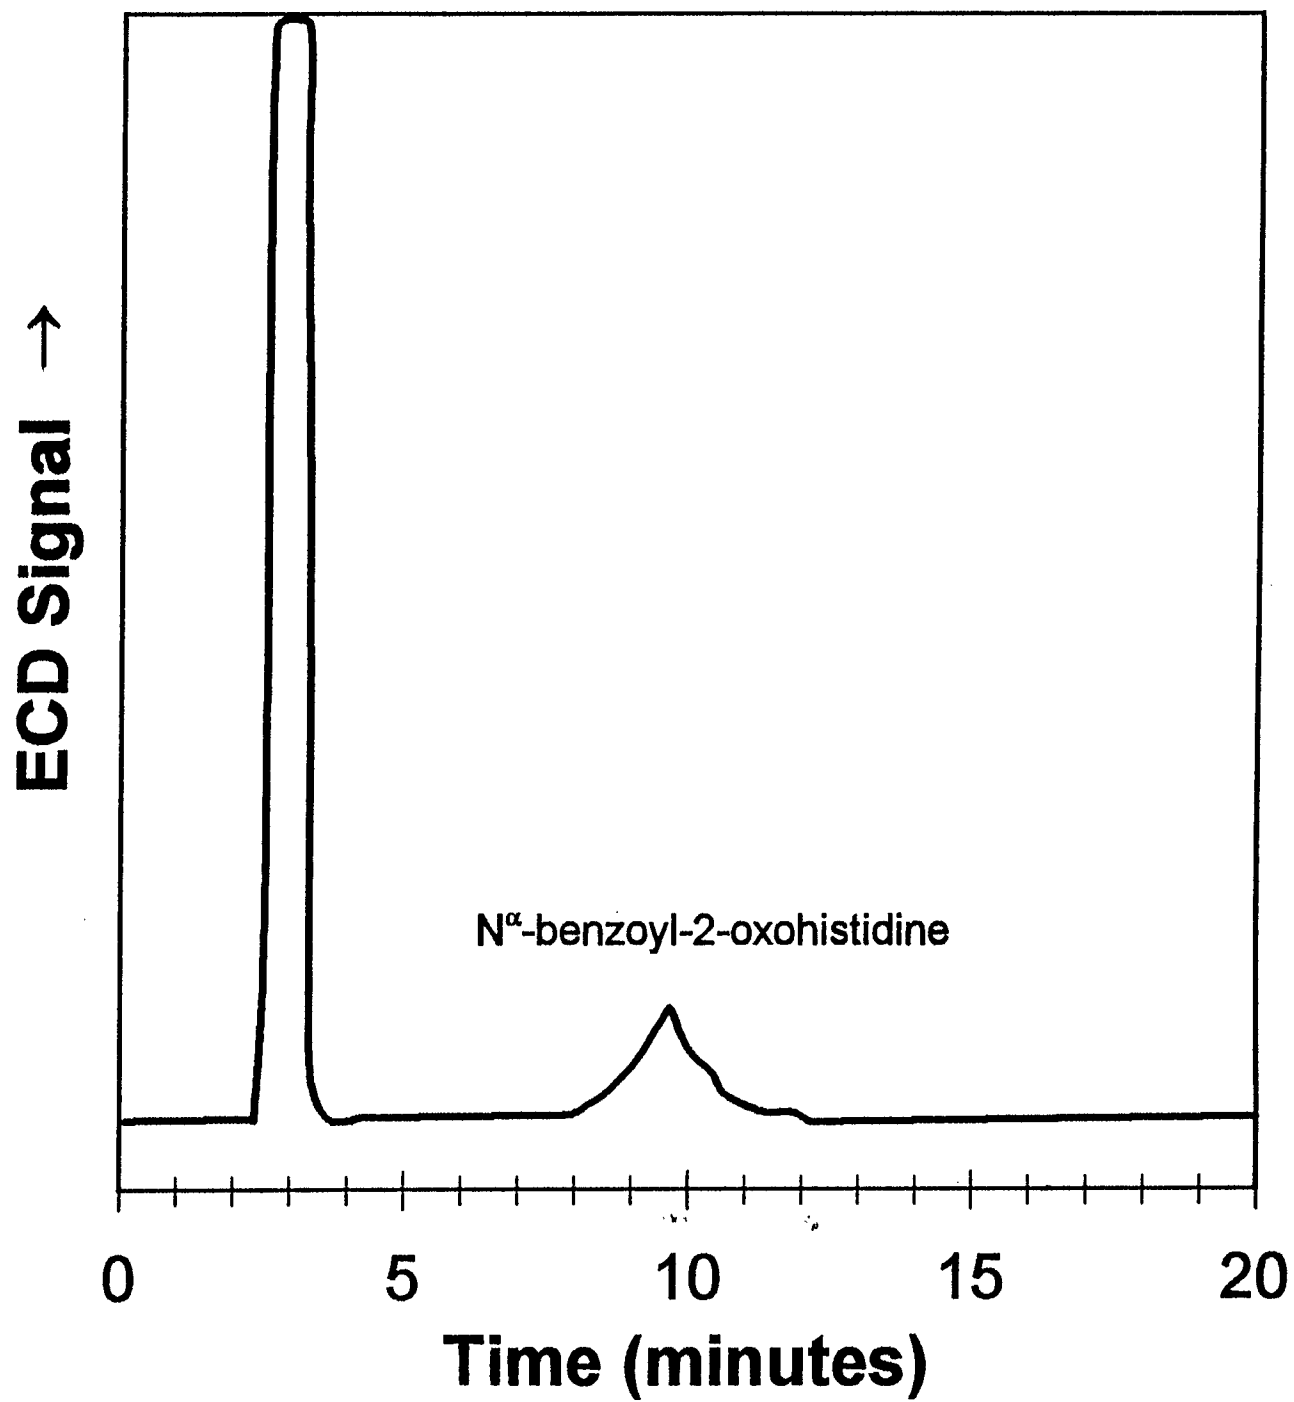

Figure S-3

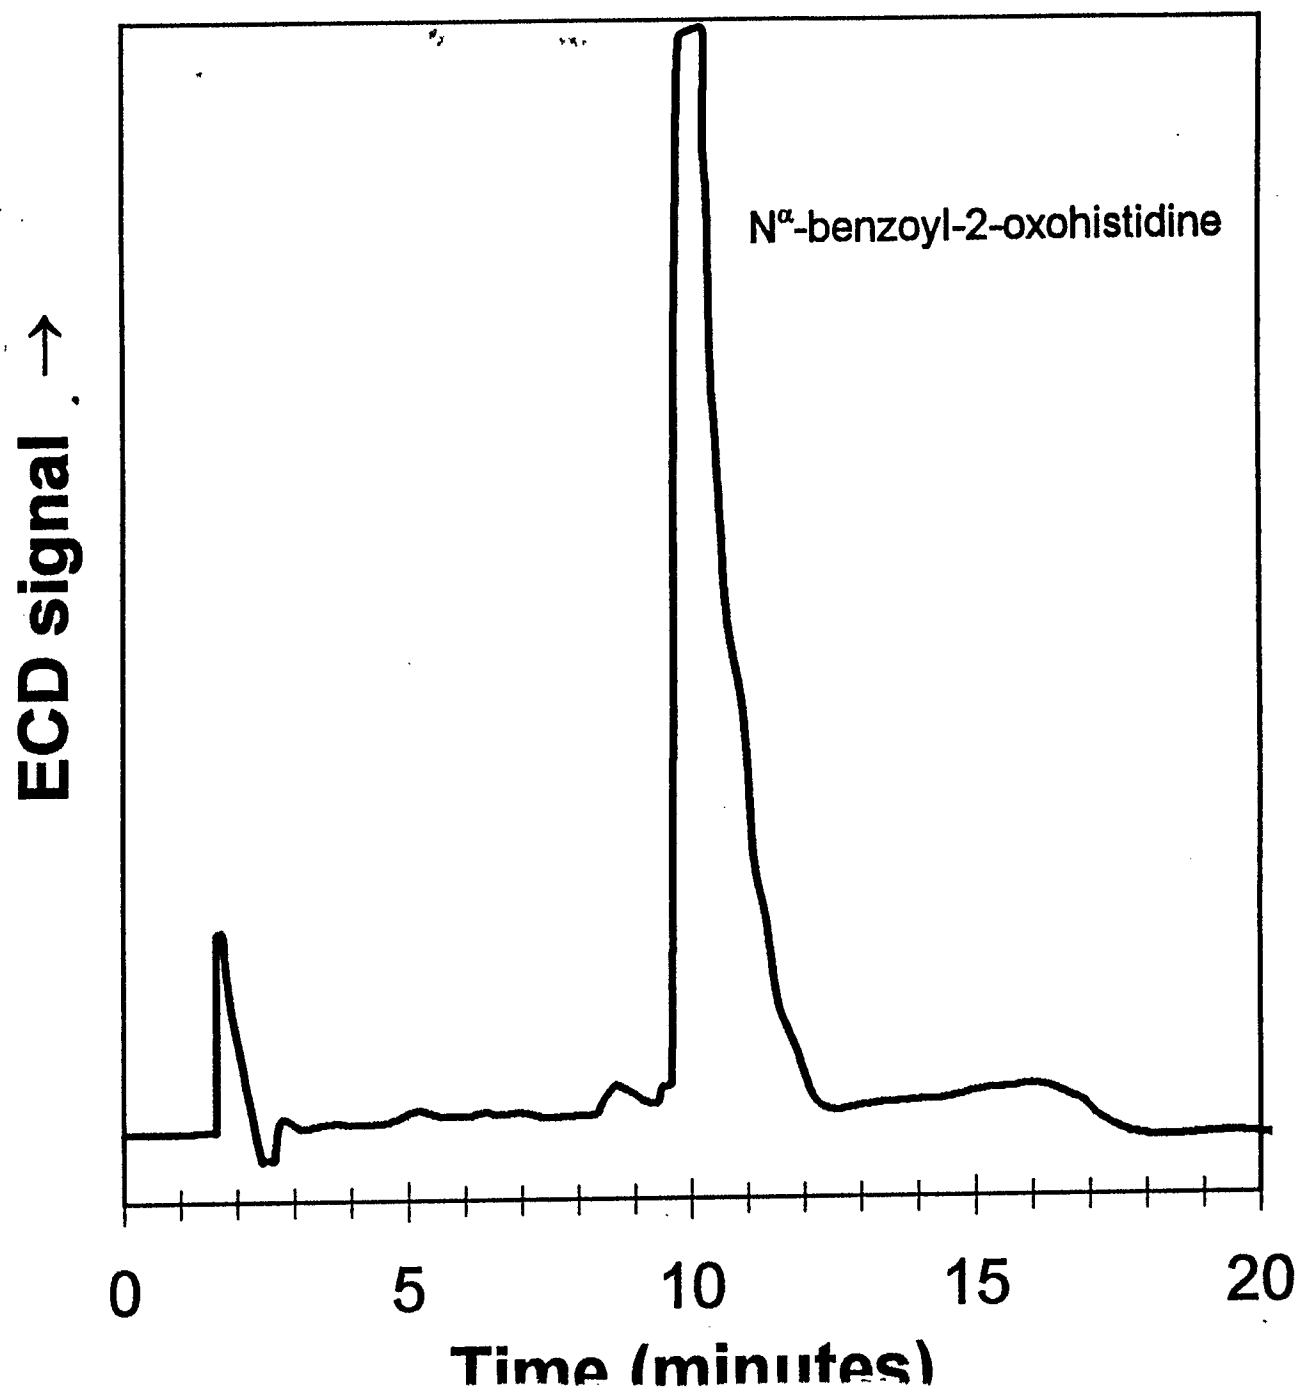

Figure S-4
